# Supplementary material for: The Potential of Mapping Grassland Plant Diversity with the Links among Spectral Diversity, Functional Trait Diversity, and Species Diversity
Source: MDPI journal article supplement (doi:10.3390/rs13153034), 2021-08-02
Supplement: s1 [file s1]

## **Supporting Information for**

The potential of mapping grassland plant diversity with the causal links among spectral diversity, functional trait diversity, and species diversity

Yujin Zhao, Yihan Sun, Wenhe Chen, Yanping Zhao, Xiaoliang Liu and Yongfei Bai

### **Contents of this file**

Table S1 Species in the grassland monoculture platform.

Figures S1 to S3

### **Introduction**

This supporting information provides one supplementary table as well as three supplementary figures for further illustrating our method and results.

**Table S1.** Plant species in the grassland monoculture platform.

| Species                       | Species ID | Genus        | Family         | Plant Groups            | Functional |
|-------------------------------|------------|--------------|----------------|-------------------------|------------|
| <i>Leymus chinensis</i>       | G          | Leymus       | Poaceae        | Perennial rhizome grass |            |
| <i>Stipa grandis</i>          | N          | Stipa        | Poaceae        | Perennial bunch grass   |            |
| <i>Agropyron cristatum</i>    | R          | Agropyron    | Poaceae        | Perennial bunch grass   |            |
| <i>Achnatherum sibiricum</i>  | H          | Achnatherum  | Poaceae        | Perennial bunch grass   |            |
| <i>Cleistogenes squarrosa</i> | S          | Cleistogenes | Poaceae        | Perennial bunch grass   |            |
| <i>Koeleria cristata</i>      | P          | Koeleria     | Poaceae        | Perennial bunch grass   |            |
| <i>Carex korshinskyi</i>      | L          | Carex        | Cyperaceae     | Perennial forbs         |            |
| <i>Allium ramosum</i>         | A          | Allium       | Amaryllidaceae | Perennial forbs         |            |
| <i>Artemisia sieversiana</i>  | Q          | Artemisia    | Asteraceae     | Annual forbs            |            |
| <i>Artemisia scoparia</i>     | O          | Artemisia    | Asteraceae     | Annual forbs            |            |

|                               |   |             |                 |                 |
|-------------------------------|---|-------------|-----------------|-----------------|
| <i>Axyris amaranthoides</i>   | B | Axyris      | Amaranthaceae   | Annual forbs    |
| <i>Chenopodium acuminatum</i> | E | Chenopodium | Amaranthaceae   | Annual forbs    |
| <i>Chenopodium aristatum</i>  | I | Chenopodium | Amaranthaceae   | Annual forbs    |
| <i>Silene aprica</i>          | U | Silene      | Caryophyllaceae | Annual forbs    |
| <i>Salsola collina</i>        | C | Salsola     | Amaranthaceae   | Annual forbs    |
| <i>Lappula myosotis</i>       | M | Lappula     | Boraginaceae    | Annual forbs    |
| <i>Allium chysanthum</i>      | D | Allium      | Amaryllidaceae  | Perennial forbs |
| <i>Dontostemon dentatus</i>   | F | Dontostemon | Brassicaceae    | Annual forbs    |
| <i>Thalictrum petaloideum</i> | T | Thalictrum  | Ranunculaceae   | Biennial forbs  |
| <i>Allium tenuissimum</i>     | J | Allium      | Amaryllidaceae  | Perennial forbs |

---

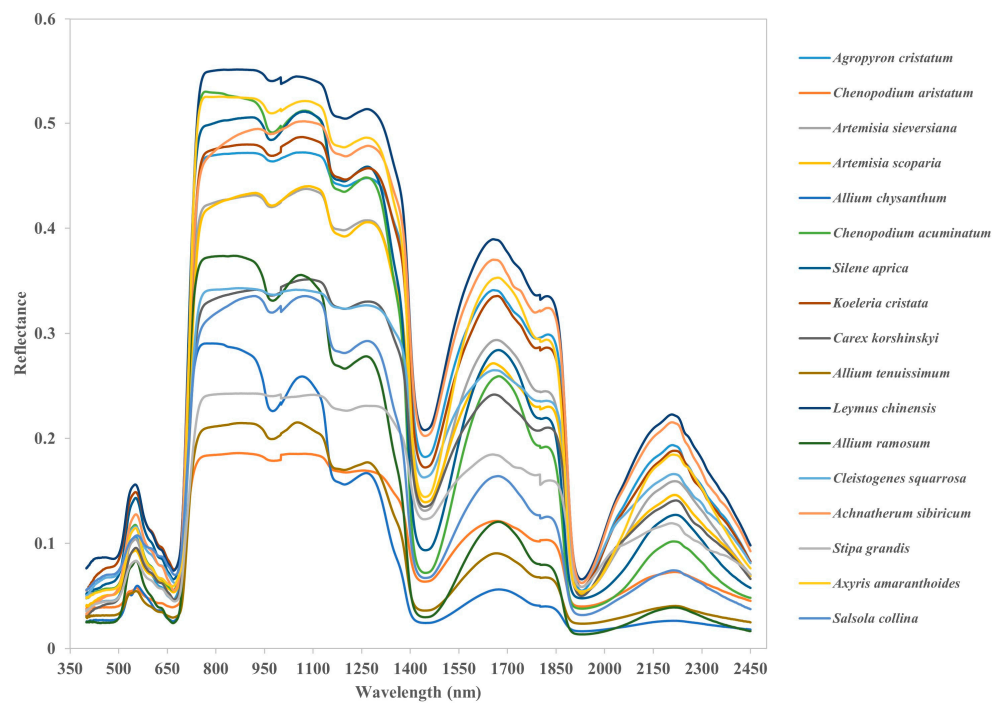

Figure S1. The average leaf reflectance of 17 species included in the study.

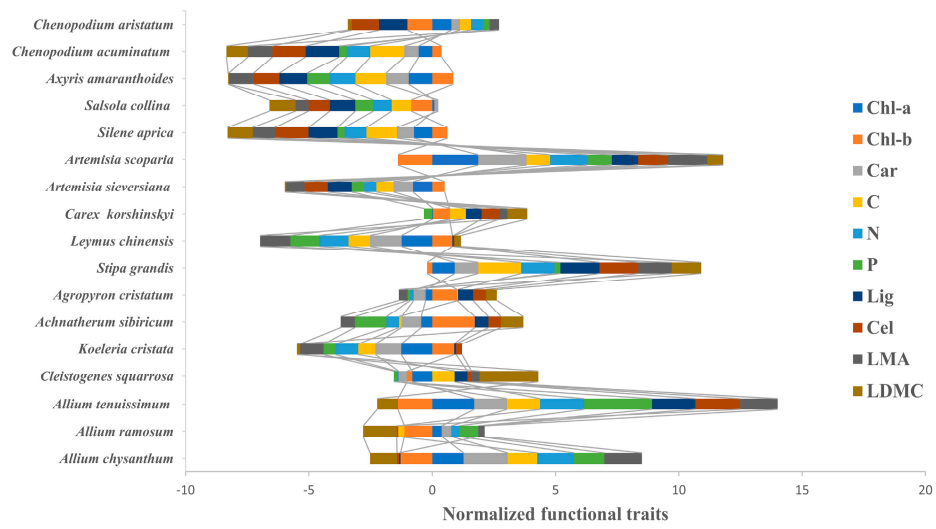

Figure S2. The normalized 10 function traits of 17 species included in the study.

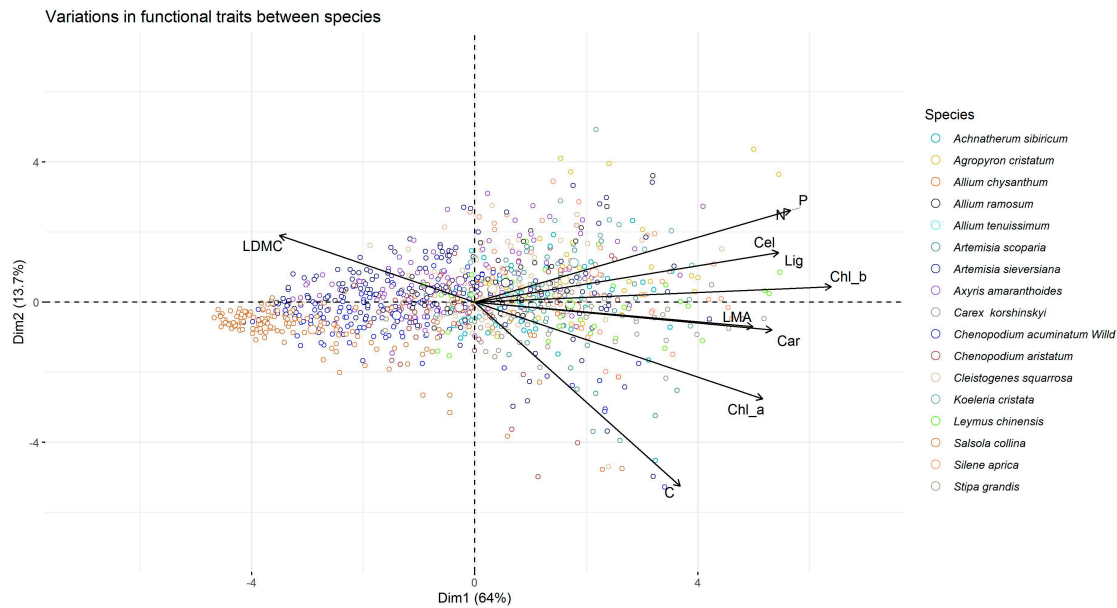

Figure S3. Multivariate leaf functional trait covariation of 17 different species based on 0.3 m × 0.3 m pixel. Arrows represent principal components loadings associated with 10 leaf functional traits (Chl\_a : Chlorophyll a, Chl\_b : Chlorophyll b, Car : Carotenoids, C : Carbon, N : Nitrogen, P : Phosphorus, Lig : Lignin, Cel : Cellulose, Water : Leaf water content, LMA : Leaf mass per area).
